# Supplementary material for: Perceived barriers to the practice of preventive measures for COVID-19 pandemic among health professionals in public health facilities of the Gamo zone, southern Ethiopia: a phenomenological study
Source: Springer Nature journal article supplement (doi:10.1186/s12889-021-10256-3), 2021-01-22
Supplement: MOESM1 [file 18791926]

## **Interview Guide**

### **A. Key informants background information**

1. Key informant code: \_\_\_\_\_
2. Age: \_\_\_\_\_
3. Sex: \_\_\_\_\_
4. Educational level: \_\_\_\_\_
5. Work experience (in year): \_\_\_\_\_
6. Job category \_\_\_\_\_
7. Position/status: \_\_\_\_\_

### **B. Interview script**

1. What do you think about COVID-19? (Origin, cause, mode of transmission, preventive measures, and treatment)
2. How health care professional prevent themselves and patients from COVID-19 transmission?
3. What do you think about precautionary measures for COVID-19 pandemic in the health facility?
4. How the staffs practicing the precautionary measures for COVID-19 pandemic in the health facility?
5. What are the perceived barriers for the practice of precautionary measures for COVID-19 pandemic by health care professionals?
6. What activities done in the health facility to prevent the spread of COVID-19?
7. What you suggest to improve the practice of health care providers to tackle COVID-19 pandemic?
8. Any additional points, you may state related to COVID-19, and barriers.

*I completed the interview, thanks a lot!*
